# Supplementary material for: Metabolic Signatures Associated with Severity in Hospitalized COVID-19 Patients
Source: MDPI journal article supplement (doi:10.3390/ijms22094794), 2021-04-30
Supplement: s1 [file s1]

# Metabolic signatures associated with severity in hospitalized COVID–19 patients

## Online Supplementary Material

### Table of contents

|      |                                                                                                                                                                                          |   |
|------|------------------------------------------------------------------------------------------------------------------------------------------------------------------------------------------|---|
| 1.   | Supplementary materials and methods                                                                                                                                                      | 2 |
| 1.1. | Standards and reagents                                                                                                                                                                   | 2 |
| 1.2. | Sample collection                                                                                                                                                                        | 2 |
| 1.3. | Sample inactivation                                                                                                                                                                      | 2 |
| 1.4. | Sample preparation for targeted metabolomics                                                                                                                                             | 2 |
| 1.5. | Instrumentation                                                                                                                                                                          | 3 |
| 1.6. | Statistical analysis                                                                                                                                                                     | 3 |
| 2.   | Supplementary Figures                                                                                                                                                                    | 5 |
| 2.1. | Figure S1. Main markers involved in the separation between (A) critical and moderate/severe patients (t[1] in Figure 1) and (B) severe and moderate/critical patients (t[2] in Figure 1) | 5 |
| 2.2. | Figure S2. Plasma levels of ceramides, hexosylceramides and hexosylceramide and ceramide ratios, in non-obese and obese patients in analysed groups.                                     | 6 |
| 2.3. | Figure S3. Plasma levels of metabolites included in tryptophan metabolism via the kynurenine pathway, in non-obese and obese patients in analysed groups.                                | 7 |
| 3.   | Supplementary Tables                                                                                                                                                                     | 7 |
| 3.1. | Table S1. Characteristics of hospitalized COVID-19 patients included in the study by severity and obesity.                                                                               | 8 |
| 3.2. | Table S2. Sphingolipids and tryptophan metabolites in moderate, severe, and critical hospitalized COVID-19 patients.                                                                     | 0 |
| 3.3. | Table S3. Detailed list of 221 biomarkers studied in COVID-19 patients grouped according to their corresponding pathway.                                                                 | 0 |
| 3.4. | Table S4. Standards and reagents, and their corresponding suppliers                                                                                                                      | 0 |
| 4.   | References                                                                                                                                                                               | 0 |

## 1. Supplementary materials and methods

### 1.1. Standards and reagents

The standards and reagents used in the present study were supplied by Sigma Aldrich (Saint Louis, MO, USA), Alsachim (Illkirch-Graffenstaden, France), Toronto Research Chemicals (Toronto, Canada), Cambridge Isotope Laboratories (Tewksbury, MA, USA), Merck (Darmstadt, Germany), NMI (Sydney, Australia) and Millipore Ibérica (Barcelona, Spain) as detailed in Table S4.

### 1.2. Sample collection

Peripheral blood samples were collected in EDTA tubes and plasma was separated by centrifugation at 3,000 rpm for 10 minutes and stored at -80°C until further analysis.

### 1.3. Sample inactivation

Plasma (200 µL) was inactivated via the addition of 800 µL of ice-cold 80% methanol and following this, the protein precipitation protocol was applied to all samples as described in Supplementary material (Sample preparation for targeted metabolomics).

### 1.4. Sample preparation for targeted metabolomics

Plasma samples previously inactivated in ice-cold methanol were centrifuged (4500 rpm, 10 min at 4 °C) to accomplish with protein precipitation. Each supernatant was aliquoted in 6 fractions and were stored at -80°C until analysis.

The determination of 221 plasma biomarkers (including 125 metabolites and 96 ratios between metabolites with potential information about enzyme activity) was achieved using six different LC-MS/MS methods. Differences in the chemical structure of the analytes made necessary the application of different analytical approaches for the proper quantification of the analytes. Six different sample preparation protocols were followed for each one of the families of compounds: carboxylic acids, polar neurotransmitters and related compounds, lipids, kynurenine pathway, phase I, and phase II steroids.

#### 1.4.1. Carboxylic acids

The analysis of carboxylic acids was performed by adapting a previously reported method.<sup>1</sup> Initially, 25 µL aliquot of plasma diluted x5 were mixed with 30 µL of the corresponding ISTD (Table S4). Then, carboxylic acids were derivatized by adding 100 µL of the mixture of o-benzyl hydroxylamine (1M) and N-(3-Dimethylaminopropyl)-N'-ethylcarbodiimide hydrochloride (1M) into the samples and left at room temperature during 1 hour. Subsequently, a liquid-liquid extraction with water and ethyl acetate was performed and the organic extract was evaporated until dry (N<sub>2</sub> stream, 40 °C, <15 psi). The extracts were reconstituted in 300 µL of water: methanol (1:1, v:v) and 3 µL were injected into the LC-MS/MS system.

#### 1.4.2. Polar neurotransmitters and related compounds

Fourteen neurotransmitters and related compounds were quantified in the plasma samples by using two alternative treatments (dilution x5 and dilution x100), both adapted from previously reported method.<sup>2</sup> For the first treatment, 25 µL aliquot of plasma sample diluted x5 was mixed with 50 µL of the corresponding ISTD (Table S4) and 115 µL of acetonitrile. For the second, plasma sample aliquot was diluted with water until factor 100, and 25 µL of this dilution was mixed with 50 µL of the corresponding ISTD (Table S4) and 115 µL of acetonitrile. Both extracts were injected into the LC-MS/MS system for each matrix.

#### 1.4.3. Lipids

A panel of five lipid families [diacylglycerols; (DAG), ceramides (Cer), hexosylceramides (HexCer), lysophosphatidylcholines (LPC), and sphingomyelin (SM)] in plasma samples were determined as follows. Fifty µL of plasma diluted x5 were spiked with 100 µL of the corresponding ISTD (Table S4). Samples were vortexed, centrifuged (5 min, 10,000 rpm), and injected into the LC-MS/MS system. Further details have been published elsewhere.<sup>3</sup>

#### 1.4.4. Kynurenine pathway

Biomarkers belonging to the tryptophan metabolism were quantified following a previously reported method.<sup>4</sup> Briefly, 50  $\mu$ L of the working standard solution (ISTD, Table S4) were added to 400  $\mu$ L of plasma diluted x5 and then evaporated until dry ( $N_2$  stream, 29 °C, <15 psi) and reconstituted with 100  $\mu$ L of water. Finally, 10  $\mu$ L were injected into the LC-MS/MS instrument.

#### *1.4.5. Phase I and phase II steroids*

Steroids were determined by the adaptation of previously reported methods.<sup>5,6</sup> An aliquot of 350  $\mu$ L of plasma diluted x5 was mixed with 10  $\mu$ L of corresponding ISTD (Table S4) and 1 mL of methanol. Afterwards, samples were evaporated under stream of nitrogen at 40 °C and reconstituted in 100  $\mu$ L of water: acetonitrile (9:1, v/v). Ten  $\mu$ L were injected into the LC-MS/MS system.

### **1.5. Instrumentation**

The chromatographic separation and detection of the analytes was performed using an Acquity UPLC system (Waters Associates, Milford, MA, USA) coupled to a triple quadrupole (Xevo TQs) mass spectrometer (Waters Associates) provided with an orthogonal Z-spray-electrospray interface (ESI).

The liquid chromatography (LC) separation for tryptophan metabolites, carboxylic acids, lipids and steroids (phase I) was performed using an Acquity BEH C18 column (100 mm x 2.1 mm i.d., 1.7  $\mu$ m) (Waters Associates) with a flow rate of 0.3 mL/min at 55 °C. For neurotransmitters, the LC separation was achieved by an Acquity UPLC BEH Amide 1.7  $\mu$ m (100 mm x 2.1 mm i.d., 1.7  $\mu$ m) (Waters Associates) at a flow rate of 0.6 mL/min at 55 °C, and for the steroids (phase II) an Acquity UPLC CSH C18 column (2.1  $\times$  100 mm i.d., 1.7  $\mu$ m) (Waters Associates) at a flow rate of 0.4 mL/min at 30°C was used. The mass spectrometric detection was achieved by using the positive ionization mode for tryptophan metabolites, carboxylic acids, lipids, steroids (phase I) and neurotransmitters and using the negative ionization mode for steroids (phase II).

The mobile phases selected for the determination of tryptophan metabolites, carboxylic acids, lipids and steroids (phase I) were water-ammonium formate (1 mM)-formic acid (0.01%) as mobile phase A and methanol-ammonium formate (1 mM)-formic acid (0.01%) as mobile phase B. Due to the chemical differences of each group of analytes, various chromatographic gradients were applied. The gradient program for the determination of tryptophan metabolites increased the percentage of mobile phase B linearly, as follows: 0 min, 1%; 0.5 min, 1%; 7 min, 40%; 8.5 min, 90%; 9 min, 90%; 9.5 min, 1%; 12 min, 1%. For carboxylic acid determination, the gradient program changed the percentage of mobile phase B linearly, as follows: 0 min, 30%; 1 min, 30%; 6 min, 55%; 6.8 min, 80%; 8.3 min, 99%; 9 min, 99%; 9.01 min, 30%; 10 min, 30%. For lipid determination, an isocratic gradient at 100% of mobile phase B was used for 5 minutes and for the determination of steroids (phase I) a gradient program was used with a percentage of mobile phase B, changing linearly as follows: 0 min, 15%; 0.5 min, 15%; 3 min, 40%; 16 min, 70%; 17 min, 90%; 18 min, 90%; 18.5 min, 15%; 20 min, 15%.

The mobile phases selected for the determination of neurotransmitters and steroids (phase II) were water-ammonium formate (25 mM)-formic acid (0.01%) as mobile phase A and acetonitrile:water (9:1)-ammonium formate (25 mM)-formic acid (0.01%) as mobile phase B. For neurotransmitters, the gradient program used changed the percentage of mobile phase A linearly, as follows: 0 min, 10%; 0.5 min, 10%; 2 min, 40%; 2.5 min, 40%; 2.6 min, 10%; 3.5 min, 10%. For steroids (phase II) separation, 25 mM ammonium formate in both water and acetonitrile:water (9:1) were used as aqueous and organic mobile phases, respectively, and the gradient program was as followed: 0 min, 10%; 0.5 min, 10%; 13 min, 43%; 13.5 min, 100%; 14 min, 100%; 14.5 min, 10%; 16 min, 10%.

### **1.6. Statistical analysis**

An exhaustive automated exploratory data analysis process (AutoDiscovery) was performed. The degree of association between each pair of variables of interest in the study based on the exploratory goals previously defined was automatically assessed. To do this, the system selected the proper numerical method based on the data type and distribution of the variables assessed. The numerical tests applied in each case were Spearman's Rank Correlation, Variance Analysis (ANOVA one-way, Mann-Whitney U, and Kruskal-

Wallis; normality was tested in these cases with D'Agostino/Pearson methods), and Cramer's V Contingency Index. This process was performed in each of the possible subgroups of patients generated by means of the qualitative factors previously configured. Subgroups or associations with a sample size below 5, a sample size below 1% of the total sample size or a statistical significance (*p*-value) equal or higher than 0.05 were automatically rejected. Given the nature of this multiple testing method, a high significance threshold was calculated based on the Benjamini-Hochberg method (False-Discovery Rate) to classify the rest of associations. Metabolites with signal below the limit of detection of the different analytical methods used were assigned to ½ of this limit. Univariable analysis and multivariable linear regression model adjusted by age and gender were used to study the effect of disease severity on the levels of metabolites. Partial-Least Square-Discriminant Analysis (PLS-DA) and orthogonal-PLS-DA (oPLS-DA) were also used to evaluate potential metabolic differences associated with severity. Linear correlations were calculated using Pearson's test after checking for normality and log-transforming, when necessary.

## 2. Supplementary Figures

2.1. Figure S1. Main markers involved in the separation between critical and moderate patients (t[1] in Figure 1). Abbreviations: 3OHKyn/Trp: 3-Hydroxykynurenine / Tryptophan; HexCer/Cer18:0: Hexosylceramide C18:0 / Ceramide C18:0; Kyn/Trp: Kynurenine/Tryptophan; 3OHKyn: 3-Hydroxykynurenine; E/F: Cortisone / Cortisol; HexCer/Cer20:0: Hexosylceramide C20:0 / ceramide C20:0; Trp: Tryptophan; Isovaleric/bOH: Isovalerate /  $\beta$ -hydroxybutyrate; Val/Trp: Valine / Tryptophan; HexCer/Cer24:1: Hexosylceramide C24:1 / ceramide C24:1; Trp/LNAA: Tryptophan / Long neutral amino acids; AcAcO: Acetoacetate; AIIIE/AIIF: Cortisone metabolites / Cortisol metabolites; Trp/Phe: Tryptophan/Phenylalanine; AcAcO/Leu: Acetoacetate/Leucine.

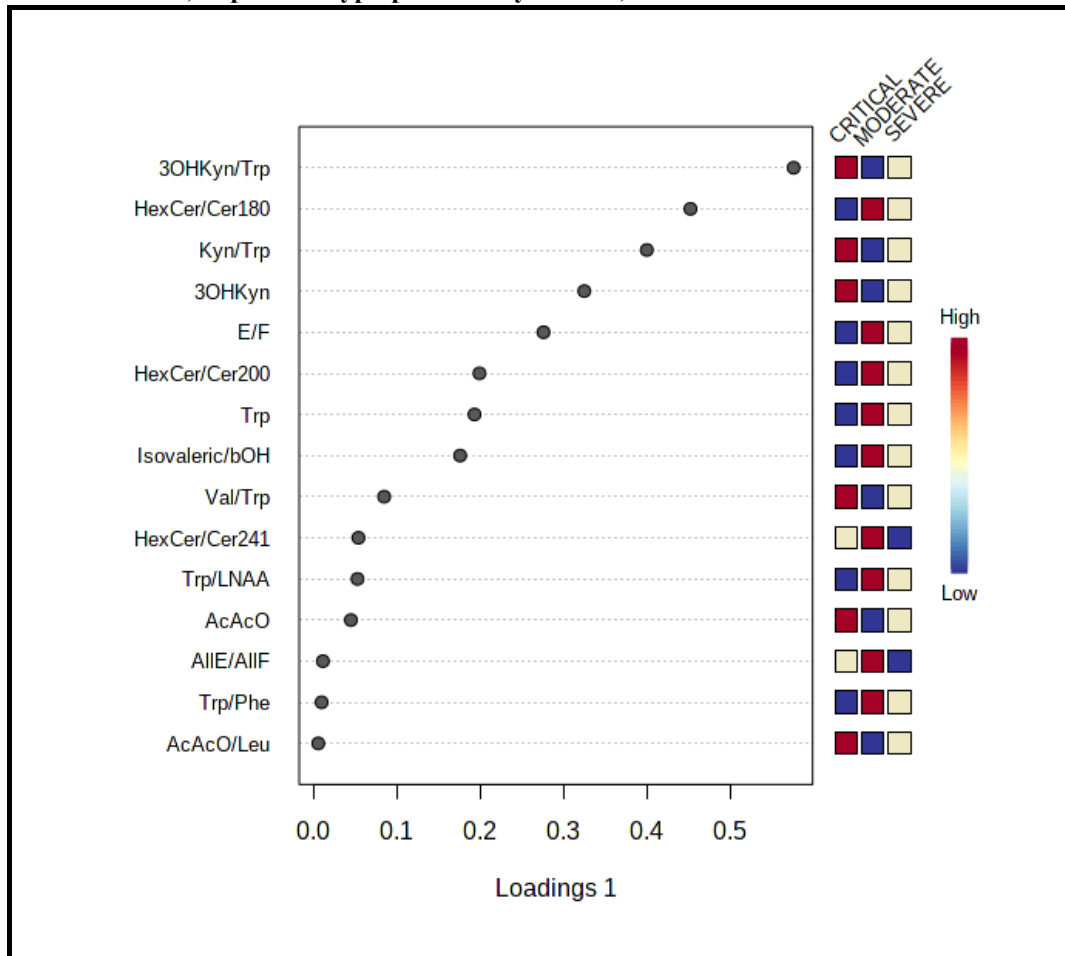

**2.2. Figure S2. Plasma levels of ceramides, hexosylceramides and hexosylceramide and ceramide ratios, in non-obese and obese patients in analysed groups.**

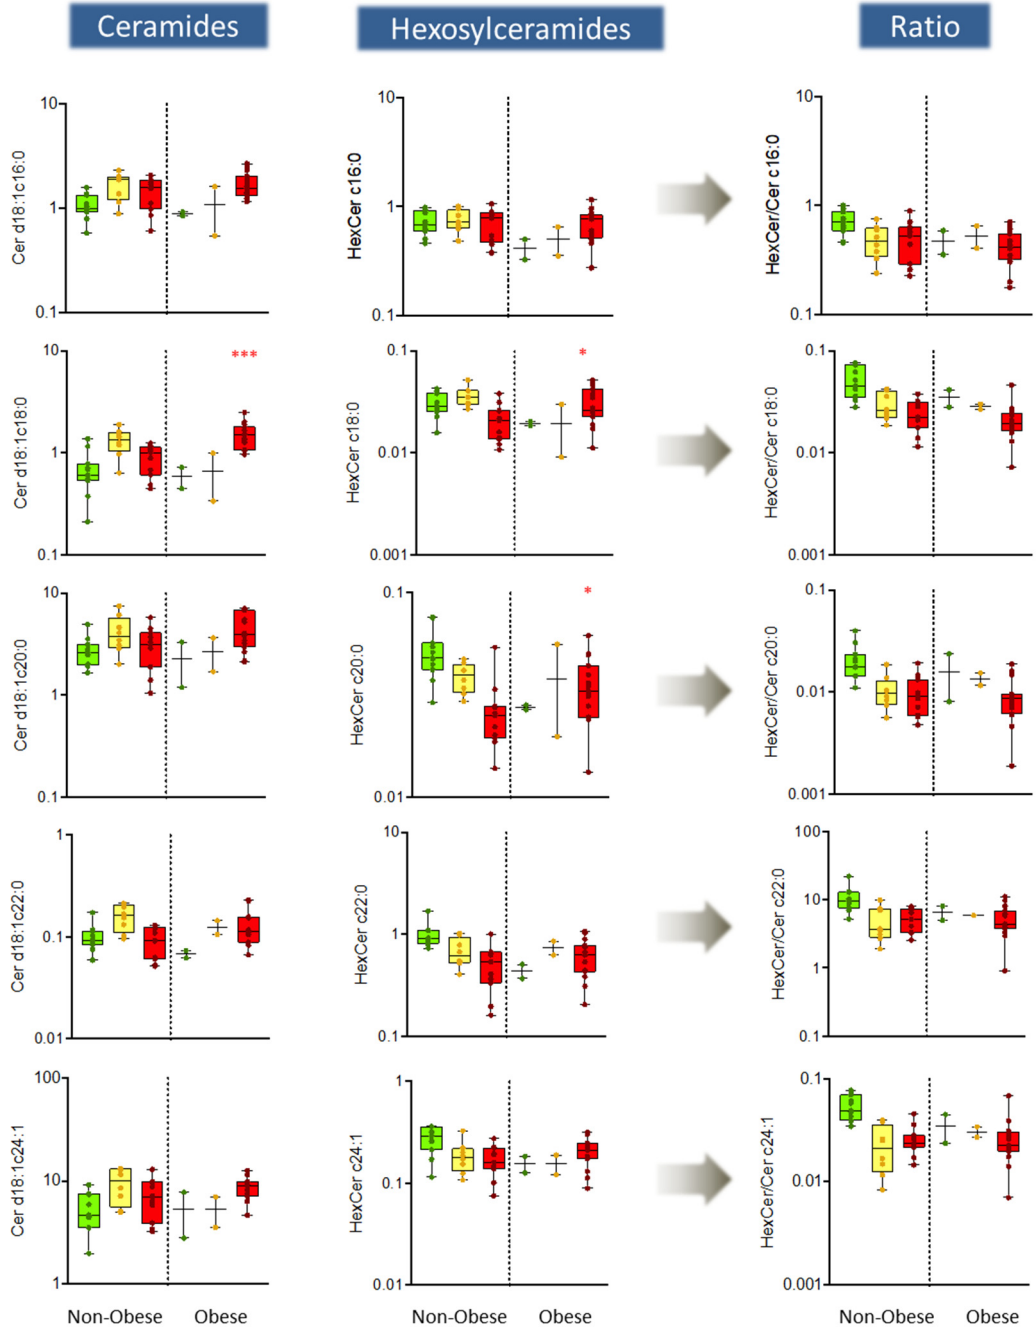

**2.3. Figure S3. Plasma levels of metabolites included in tryptophan metabolism via the kynurenine pathway, in non-obese and obese patients in analysed groups.**

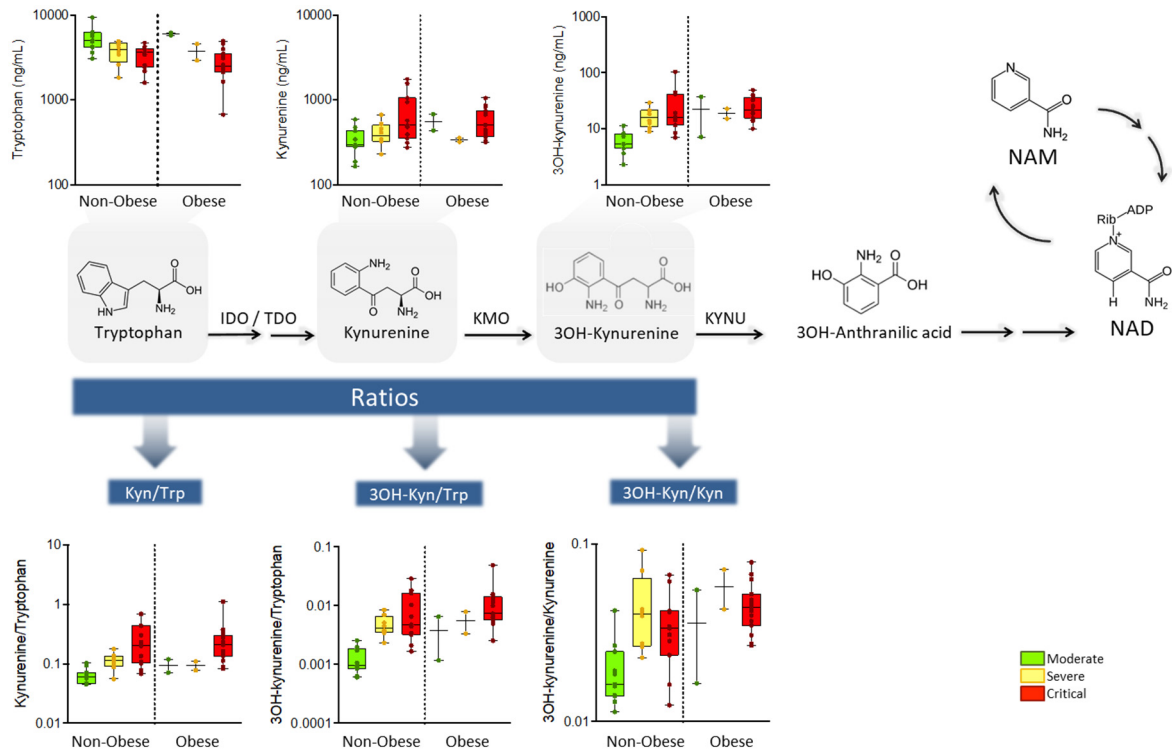

**3. Supplementary Tables**

**3.1. Table S1. Characteristics of hospitalized COVID-19 patients included in the study by severity and obesity.**

|                                      | Moderate<br>n = 13  |                     | Severe<br>n = 10   |                | Critical<br>n = 26  |                       |
|--------------------------------------|---------------------|---------------------|--------------------|----------------|---------------------|-----------------------|
|                                      | Non-Obese<br>n = 11 | Obese<br>n = 2      | Non-Obese<br>n = 8 | Obese<br>n = 2 | Non-Obese<br>n = 11 | Obese<br>n = 15       |
| <b>Demographics</b>                  |                     |                     |                    |                |                     |                       |
| Age, years                           | 51 (16)             | ---                 | 50 (15)            | ---            | 61 (11)             | 58 (10)               |
| Gender, male                         | 5 (45.5)            | 2 (100)             | 4 (50)             | 1 (50)         | 6 (54.5)            | 6 (40)                |
| Body mass index (Kg/m <sup>2</sup> ) | 23 (6)              | ---                 | 26 (4)             | ---            | 25 (3)              | 36 (4) <sup>a</sup>   |
| APACHE II score                      | 6 (3)               | ---                 | 11 (5)             | ---            | 18 (7)              | 15 (4)                |
| <b>Chronic comorbidities</b>         |                     |                     |                    |                |                     |                       |
| Chronic lung disease                 | 3 (27.3)            | 1 (50)              | 5 (62.5)           | 1 (50)         | 9 (81.8)            | 9 (60)                |
| Asthma                               | 1 (9.1)             | 0 (0)               | 3 (37.5)           | 0 (0)          | 1 (9.1)             | 0 (0)                 |
| COPD                                 | 0 (0)               | 0 (0)               | 1 (12.5)           | 0 (0)          | 0 (0)               | 0 (0)                 |
| COPD                                 | 1 (9.1)             | 0 (0)               | 1 (12.5)           | 0 (0)          | 1 (9.1)             | 0 (0)                 |
| Cardiovascular disease               | 2 (18.2)            | 1 (50)              | 3 (37.5)           | 0 (0)          | 7 (63.6)            | 8 (53.3)              |
| Coronary artery disease              | 0 (0)               | 1 (50) <sup>a</sup> | 0 (0)              | 0 (0)          | 0 (0)               | 0 (0)                 |
| Hypertension                         | 2 (18.2)            | 1 (50)              | 3 (37.5)           | 0 (0)          | 7 (63.6)            | 8 (53.3)              |
| Atrial fibrillation                  | 0 (0)               | 0 (0)               | 0 (0)              | 0 (0)          | 0 (0)               | 1 (6.7)               |
| <b>Other medical conditions</b>      |                     |                     |                    |                |                     |                       |
| Immunosuppression                    | 0 (0)               | 0 (0)               | 1 (12.5)           | 0 (0)          | 1 (9.1)             | 1 (6.7)               |
| Alcoholism                           | 2 (18.2)            | 1 (50)              | 1 (12.5)           | 0 (0)          | 1 (9.1)             | 2 (13.3)              |
| Current or former smoker             | 2 (18.2)            | 0 (0)               | 1 (12.5)           | 0 (0)          | 3 (27.3)            | 3 (20)                |
| Dislipidaemia                        | 0 (0)               | 1 (50) <sup>a</sup> | 1 (12.5)           | 1 (50)         | 1 (9.1)             | 7 (46.7) <sup>a</sup> |
| Diabetes mellitus                    | 0 (0)               | 1 (50) <sup>a</sup> | 2 (25)             | 0 (0)          | 3 (27.3)            | 4 (26.7)              |
| Liver disease                        | 1 (9.1)             | 0 (0)               | 0 (0)              | 0 (0)          | 0 (0)               | 0 (0)                 |
| Chronic renal failure                | 0 (0)               | 0 (0)               | 0 (0)              | 0 (0)          | 1 (9.1)             | 2 (13.3)              |
| Haematological malignancies          | 1 (9.1)             | 0 (0)               | 0 (0)              | 0 (0)          | 0 (0)               | 0 (0)                 |
| Solid tumour                         | 1 (9.1)             | 0 (0)               | 1 (12.5)           | 0 (0)          | 1 (9.1)             | 0 (0)                 |
| Hypothyroidism                       | 1 (9.1)             | 0 (0)               | 0 (0)              | 0 (0)          | 0 (0)               | 2 (13.3)              |
| HIV                                  | 1 (9.1)             | 0 (0)               | 0 (0)              | 0 (0)          | 0 (0)               | 0 (0)                 |
| <b>Chronic medications</b>           |                     |                     |                    |                |                     |                       |
| Inhaled corticosteroids              | 0 (0)               | 0 (0)               | 0 (0)              | 0 (0)          | 1 (9.1)             | 0 (0)                 |



|                                                        |            |                     |            |                      |            |                       |
|--------------------------------------------------------|------------|---------------------|------------|----------------------|------------|-----------------------|
| Biological drugs                                       | 0 (0)      | 0 (0)               | 0 (0)      | 0 (0)                | 1 (9.1)    | 0 (0)                 |
| ACE inhibitors                                         | 0 (0)      | 1 (50) <sup>a</sup> | 2 (25)     | 0 (0)                | 3 (27.3)   | 3 (20)                |
| Angiotensin II blockers                                | 1 (9.1)    | 0 (0)               | 0 (0)      | 0 (0)                | 1 (9.1)    | 2 (13.3)              |
| Statins                                                | 0 (0)      | 1 (50) <sup>a</sup> | 0 (0)      | 0 (0)                | 1 (9.1)    | 2 (13.3)              |
| Oral corticosteroids                                   | 0 (0)      | 0 (0)               | 1 (12.5)   | 0 (0)                | 1 (9.1)    | 1 (6.7)               |
| <b>Symptoms</b>                                        |            |                     |            |                      |            |                       |
| Cough                                                  | 6 (54.5)   | 2 (100)             | 8 (100)    | 1 (50) <sup>a</sup>  | 6 (54.5)   | 13 (86.7)             |
| Fever                                                  | 7 (63.6)   | 1 (50)              | 8 (100)    | 1 (50) <sup>a</sup>  | 10 (90.9)  | 13 (86.7)             |
| Sore throat                                            | 1 (9.1)    | 0 (0)               | 0 (0)      | 0 (0)                | 0 (0)      | 0 (0)                 |
| Headache                                               | 3 (27.3)   | 1 (50)              | 1 (12.5)   | 2 (100) <sup>a</sup> | 1 (9.1)    | 1 (6.7)               |
| Rhinorrhea                                             | 0 (0)      | 0 (0)               | 1 (12.5)   | 0 (0)                | 0 (0)      | 0 (0)                 |
| Myalgia                                                | 3 (27.3)   | 1 (50)              | 2 (25)     | 2 (100)              | 1 (9.1)    | 1 (6.7)               |
| Sputum                                                 | 0 (0)      | 0 (0)               | 3 (37.5)   | 0 (0)                | 0 (0)      | 4 (26.7)              |
| Diarrhea                                               | 2 (18.2)   | 1 (50)              | 1 (12.5)   | 1 (50)               | 1 (9.1)    | 4 (26.7)              |
| Chest pain                                             | 1 (9.1)    | 1 (50)              | 1 (12.5)   | 0 (0)                | 1 (9.1)    | 2 (13.3)              |
| Nausea/vomiting                                        | 1 (9.1)    | 0 (0)               | 1 (12.5)   | 0 (0)                | 0 (0)      | 1 (6.7)               |
| Dyspnea                                                | 2 (18.2)   | 1 (50)              | 5 (62.5)   | 1 (50)               | 9 (81.8)   | 12 (80)               |
| Altered mental status                                  | 0 (0)      | 0 (0)               | 0 (0)      | 0 (0)                | 1 (9.1)    | 1 (6.7)               |
| Symptoms GAP                                           | 5 (3-7)    | ---                 | 7 (4-12)   | ---                  | 5 (3-8)    | 8 (6-11) <sup>a</sup> |
| <b>Treatment received in hospital before inclusion</b> |            |                     |            |                      |            |                       |
| Hydroxychloroquine                                     | 4 (36.4)   | 0 (0)               | 4 (50)     | 1 (50)               | 4 (36.4)   | 6 (40)                |
| Systemic corticosteroids                               | 0 (0)      | 0 (0)               | 4 (50)     | 1 (50)               | 2 (18.2)   | 4 (26.7)              |
| Hydrocortisone                                         | 0 (0)      | 0 (0)               | 0 (0)      | 0 (0)                | 0 (0)      | 1 (6.7)               |
| Methylprednisone                                       | 0 (0)      | 0 (0)               | 2 (25)     | 0 (0)                | 0 (0)      | 3 (20)                |
| Dexamethasone                                          | 0 (0)      | 0 (0)               | 2 (25)     | 1 (50)               | 2 (18.2)   | 0 (0)                 |
| Tocilizumab                                            | 0 (0)      | 0 (0)               | 2 (25)     | 0 (0)                | 1 (9.1)    | 1 (6.7)               |
| <b>Vital signs at inclusion</b>                        |            |                     |            |                      |            |                       |
| Temperature, °C                                        | 37.1 (1.3) | ---                 | 35.8 (1.0) | ---                  | 35.8 (0.9) | 36.1 (1.4)            |
| Heart rate, bpm                                        | 82 (17)    | ---                 | 81 (14)    | ---                  | 74 (13)    | 80 (13)               |
| Respiratory rate, rpm                                  | 22 (16-24) | ---                 | 26 (21-34) | ---                  | 30 (24-34) | 24 (21-26)            |
| Systolic blood pressure, mmHg                          | 128 (17)   | ---                 | 111 (18)   | ---                  | 120 (22)   | 104 (22)              |
| Diastolic blood pressure, mmHg                         | 80 (11)    | ---                 | 68 (13)    | ---                  | 63 (15)    | 63 (17)               |
| Mean blood pressure, mmHg                              | 97 (11)    | ---                 | 82 (13)    | ---                  | 82 (16)    | 76 (17)               |

|                                                                    |                  |         |                  |         |                    |                    |
|--------------------------------------------------------------------|------------------|---------|------------------|---------|--------------------|--------------------|
| Oxygen saturation, %                                               | 98 (96-99)       | ---     | 98 (97-99)       | ---     | 94 (93-97)         | 94 (93-97)         |
| Fraction of inspired oxygen, %                                     | ---              | ---     | 100 (82-100)     | ---     | 100 (60-100)       | 80 (55-100)        |
| Arterial oxygen pressure, mmHg                                     | ---              | ---     | 91 (78-118)      | ---     | 89 (62-115)        | 77 (68-91)         |
| P <sub>a</sub> O <sub>2</sub> /F <sub>I</sub> O <sub>2</sub> ratio | ---              | ---     | 104 (78-187)     | ---     | 107 (91-133)       | 110 (72-179)       |
| S <sub>a</sub> O <sub>2</sub> /F <sub>I</sub> O <sub>2</sub> ratio | ---              | ---     | 98 (97-161)      | ---     | 98 (94-156)        | 116 (96-170)       |
| <b>Analytical variables at inclusion</b>                           |                  |         |                  |         |                    |                    |
| C-reactive protein, mg/mL                                          | 3.8 (4.1)        | ---     | 15 (11)          | ---     | 21.7 (14.0)        | 25 (12)            |
| Procalcitonin, ng/mL                                               | 0.12 (0.03-0.12) | ---     | 0.24 (0.08-0.64) | ---     | 0.49 (0.27-1.48)   | 0.36 (0.16-1.13)   |
| Leukocytes, x10 <sup>3</sup> /μL                                   | 6.3 (5.9-8.9)    | ---     | 7.36 (6.19-9.93) | ---     | 8.27 (6.82-13.83)  | 9.31 (6.13-11.49)  |
| Lymphocytes, x10 <sup>3</sup> /μL                                  | 1.5 (1.0-2.4)    | ---     | 0.87 (0.81-1.02) | ---     | 0.68 (0.35-0.95)   | 0.87 (0.64-1.23)   |
| IL-6, pg/mL                                                        | ---              | ---     | 43.8 (4.3-102.0) | ---     | 132.1 (22.8-266.2) | 125.5 (37.4-205.5) |
| Fibrinogen, mg/dL                                                  | 497 (390-500)    | ---     | 500 (398-500)    | ---     | 500 (500-500)      | 500 (500-500)      |
| D-dimer, ng/mL                                                     | 620 (377-780)    | ---     | 2250 (1022-3957) | ---     | 1710 (1090-3980)   | 1610 (970-2560)    |
| Lactate, mg/dL                                                     | 1.13 (0.82-1.29) | ---     | 1.62 (1.03-1.87) | ---     | 1.75 (1.26-1.85)   | 1.42 (1.15-2.89)   |
| LDH, U/L                                                           | 212 (171-269)    | ---     | 424 (400-466)    | ---     | 541 (356-835)      | 413 (349-542)      |
| Ferritin, μg/L                                                     | ---              | ---     | 1009 (664-2040)  | ---     | 717 (673-2638)     | 965 (464-3790)     |
| <b>Radiological findings at inclusión</b>                          |                  |         |                  |         |                    |                    |
| Bilateral infiltrates                                              | 5 (45.5)         | 2 (100) | 8 (100)          | 2 (100) | 11 (100)           | 15 (100)           |
| Ground glass                                                       | 7 (63.6)         | 2 (100) | 6 (75)           | 1 (50)  | 5 (45.5)           | 8 (53.3)           |
| Consolidation                                                      | 7 (63.6)         | 2 (100) | 6 (75)           | 2 (100) | 8 (72.7)           | 9 (60)             |

Data expressed as frequencies and percentages [n (%)] or mean (SD) or median (IQR)].

<sup>a</sup> p ≤ 0.05 compared to non-obese.

**3.2. Table S2.** Sphingolipids and tryptophan metabolites in moderate, severe, and critical hospitalized COVID-19 patients.

|                                  | Moderate<br>n = 13 | Severe<br>n = 10           | Critical<br>n = 26         | p-value <sup>d</sup> |
|----------------------------------|--------------------|----------------------------|----------------------------|----------------------|
| <b>Sphingolipids (resp.)</b>     |                    |                            |                            |                      |
| <b>Ceramides (Cer)</b>           |                    |                            |                            |                      |
| Cer C14:0                        | 0.206 (0.082)      | 0.219 (0.107)              | 0.180 (0.069)              | 0.336                |
| Cer C16:0 <sup>a</sup>           | 1.03 (0.27)        | 1.56 (0.56) <sup>b</sup>   | 1.59 (0.49) <sup>b</sup>   | 0.002                |
| Cer C18:0 <sup>a</sup>           | 0.675 (0.308)      | 1.188 (0.466) <sup>b</sup> | 1.251 (0.481) <sup>b</sup> | 0.001                |
| Cer C20:0                        | 2.64 (0.97)        | 3.89 (1.77)                | 3.85 (1.77)                | 0.067                |
| Cer C22:0 <sup>a</sup>           | 0.094 (0.029)      | 0.152 (0.044) <sup>b</sup> | 0.113 (0.045) <sup>c</sup> | 0.007                |
| Cer C24:0 <sup>a</sup>           | 1.77 (0.45)        | 2.32 (0.71)                | 1.66 (0.72) <sup>c</sup>   | 0.036                |
| Cer C24:1 <sup>a</sup>           | 5.43 (2.24)        | 8.70 (3.72) <sup>b</sup>   | 7.99 (2.64) <sup>b</sup>   | 0.010                |
| <b>Hexosylceramides (HexCer)</b> |                    |                            |                            |                      |
| HexCer C16:0                     | 0.672 (0.204)      | 0.700 (0.199)              | 0.691 (0.222)              | 0.947                |
| HexCer C18:0                     | 0.029 (0.009)      | 0.033 (0.011)              | 0.027 (0.012)              | 0.273                |
| HexCer C20:0 <sup>a</sup>        | 0.047 (0.016)      | 0.039 (0.010)              | 0.031 (0.012) <sup>b</sup> | 0.002                |
| HexCer C22:0 <sup>a</sup>        | 0.893 (0.315)      | 0.699 (0.209)              | 0.577 (0.253) <sup>b</sup> | 0.004                |
| HexCer C24:0 <sup>a</sup>        | 0.178 (0.109)      | 0.108 (0.068)              | 0.091 (0.042) <sup>b</sup> | 0.003                |
| HexCer C24:1 <sup>a</sup>        | 0.256 (0.088)      | 0.180 (0.064) <sup>b</sup> | 0.191 (0.063) <sup>b</sup> | 0.018                |
| <b>Ratio HexCer/Cer</b>          |                    |                            |                            |                      |
| C16:0 <sup>a</sup>               | 0.669 (0.191)      | 0.492 (0.161)              | 0.466 (0.177) <sup>b</sup> | 0.004                |
| C18:0 <sup>a</sup>               | 0.048 (0.017)      | 0.029 (0.008) <sup>b</sup> | 0.022 (0.008) <sup>b</sup> | 0.000                |
| C20:0 <sup>a</sup>               | 0.020 (0.008)      | 0.011 (0.004) <sup>b</sup> | 0.009 (0.004) <sup>b</sup> | 0.000                |
| C22:0 <sup>a</sup>               | 10.01 (4.47)       | 5.15 (2.55) <sup>b</sup>   | 5.48 (2.39) <sup>b</sup>   | 0.000                |
| C24:0 <sup>a</sup>               | 0.101 (0.054)      | 0.051 (0.037) <sup>b</sup> | 0.061 (0.026) <sup>b</sup> | 0.005                |
| C24:1 <sup>a</sup>               | 0.051 (0.016)      | 0.024 (0.011) <sup>b</sup> | 0.026 (0.012) <sup>b</sup> | 0.000                |
| <b>Tryptophan metabolism</b>     |                    |                            |                            |                      |
| <b>Metabolites (ng/mL)</b>       |                    |                            |                            |                      |
| Tryptophan <sup>a</sup>          | 5444 (1595)        | 3747 (1032) <sup>b</sup>   | 3024 (1085) <sup>b</sup>   | 0.000                |
| Serotonin                        | 19.2 (17.8)        | 14.9 (11.0)                | 11.3 (8.5)                 | 0.326                |
| 5-Hydroxyindoleacetic acid       | 1.81 (1.94)        | 1.73 (1.54)                | 3.44 (3.42)                | 0.115                |

|                                    |               |                            |                            |       |
|------------------------------------|---------------|----------------------------|----------------------------|-------|
| Kynurenine <sup>a</sup>            | 377 (150)     | 397 (126)                  | 644 (381) <sup>b</sup>     | 0.016 |
| Kynurenic acid                     | 9.6 (7.45)    | 8.86 (2.25)                | 20.96 (26.3)               | 0.327 |
| 3OHKyn <sup>a</sup>                | 8.8 (8.9)     | 17.5 (6.3) <sup>b</sup>    | 26.1 (20.0) <sup>b</sup>   | 0.008 |
| Anthranilic acid                   | 0.083 (0.050) | 0.070 (0.063)              | 0.126 (0.085)              | 0.080 |
| Nicotinic acid                     | 14.1 (8.1)    | 33.3 (23.5)                | 23.1 (20.7)                | 0.067 |
| Nicotinamide                       | 51.9 (38.2)   | 73.0 (66.8)                | 45.4 (34.9)                | 0.260 |
| <b>Ratios</b>                      |               |                            |                            |       |
| Kynurenine/tryptophan <sup>a</sup> | 0.070 (0.022) | 0.111 (0.034)              | 0.258 (0.224) <sup>b</sup> | 0.003 |
| Kynurenic acid/kynurenine          | 0.025 (0.009) | 0.023 (0.005)              | 0.028 (0.021)              | 0.734 |
| 3OHKyn/kynurenine <sup>a</sup>     | 0.022 (0.013) | 0.048 (0.023) <sup>b</sup> | 0.041 (0.016) <sup>b</sup> | 0.001 |
| 3OHKyn/tryptophan <sup>a</sup>     | 0.002 (0.002) | 0.005 (0.002) <sup>b</sup> | 0.011 (0.010) <sup>b</sup> | 0.003 |
| Serotonin/kynurenine <sup>a</sup>  | 0.060 (0.052) | 0.044 (0.044)              | 0.022 (0.020) <sup>b</sup> | 0.011 |
| 5-hydroxyindoleacetic/3OHKyn       | 0.218 (0.161) | 0.103 (0.097)              | 0.140 (0.101)              | 0.120 |

---

|                                    |               |                            |                            |       |
|------------------------------------|---------------|----------------------------|----------------------------|-------|
| <b>NAD consuming reactions</b>     |               |                            |                            |       |
| <b>Ratios</b>                      |               |                            |                            |       |
| Cortisone/Cortisol <sup>a</sup>    | 0.120 (0.061) | 0.062 (0.013) <sup>b</sup> | 0.053 (0.024) <sup>b</sup> | 0.000 |
| Succinate/ $\alpha$ -ketoglutarate | 0.240 (0.073) | 0.216 (0.073)              | 0.180 (0.114) <sup>b</sup> | 0.203 |
| Lactate/Pyruvate <sup>a</sup>      | 39.4 (34.8)   | 30.2 (10.3)                | 20.8 (7.3) <sup>b, c</sup> | 0.021 |

<sup>a</sup>  $p \leq 0.05$  between moderate, severe and critical in univariable ANOVA analysis.

<sup>b</sup>  $p \leq 0.05$  compared to moderate

<sup>c</sup>  $p \leq 0.05$  compared to severe

<sup>d</sup> p-value obtained by multivariable linear regression model adjusting by age and gender

Values are means (SD). Abbreviations: Cer: ceramides; HexCer: hexosylceramides; resp.: response; 3OHKyn: 3-hydroxykynurenine.

**3.3. Table S3.** Detailed list of 221 biomarkers studied in COVID-19 patients grouped according to their corresponding pathway.

| Analytes                              |                              | Ratios                                           |                                                       |
|---------------------------------------|------------------------------|--------------------------------------------------|-------------------------------------------------------|
| Neurotransmitters and polar compounds |                              |                                                  |                                                       |
| Creatinine                            | Glutamic acid                | Tryptophan / long neutral amino acids            | Glutamine / glutamic acid                             |
| Creatine                              | Acetyl carnitine             | Tyrosine / long neutral amino acids              | Tyrosine / phenylalanine                              |
| Valine                                | Carnitine                    | Phenylalanine / long neutral amino acids         | Tryptophan / phenylalanine                            |
| Leucine                               | Phenylalanine                | Leucine / long neutral amino acids               | Acetylcarnitine / carnitine                           |
| Isoleucine                            | Tyrosine                     | Isoleucine / long neutral amino acids            | Creatinine / creatine                                 |
| Choline                               | Trimethylamine N-oxide       | Valine / long neutral amino acids                | Trimethylamine N-oxide / choline                      |
| Glutamine                             |                              | Methionine / long neutral amino acids            | Valine / tryptophan                                   |
| Methionine                            |                              | Aromatic amino acids / brain chained amino acids |                                                       |
| Tryptophan metabolism                 |                              |                                                  |                                                       |
| Tryptophan                            | Anthranilic acid             | Kynurenine / tryptophan                          | Anthranilic acid / kynurenine                         |
| Serotonin                             | Nicotinic acid               | Kynurenic acid / kynurenine                      | Anthranilic acid / tryptophan                         |
| 5-Hydroxyindoleacetic acid            | Nicotinamide                 | 3-hydroxykynurenine / kynurenine                 | 5-Hydroxyindoleacetic / acid tryptophan               |
| Kynurenine                            |                              | 3-hydroxykynurenine / tryptophan                 | Nicotinic acid / nicotinamide                         |
| Kynurenic acid                        |                              | Serotonin / kynurenine                           | N-acetylmethionine / 3-hydroxynynurenine              |
| 3-Hydroxykynurenine                   |                              | 5-hydroxyindoleacetic / 3-hydroxykynurenine      | N-acetylmethionine / tryptophan                       |
| Carboxylic acids                      |                              |                                                  |                                                       |
| Lactate                               | $\alpha$ -ketoisocaproate    | Citrate / pyruvate                               | Malate / glyoxylate                                   |
| Pyruvate                              | $\beta$ -Hydroxybutyrate     | Isocitrate / citrate                             | Hydroxymethylbutyrate / $\alpha$ -ketoglutarate       |
| Citrate                               | 2-Hydroxyglutarate           | $\alpha$ -ketoglutarate / isocitrate             | $\alpha$ -ketoisocaproate / leucine                   |
| Isocitrate                            | Isovalerate                  | Succinate / $\alpha$ -ketoglutarate              | Isovalerate / leucine                                 |
| $\alpha$ -ketoglutarate               |                              | Fumarate / succinate                             | Hydroxymethylbutyrate / leucine                       |
| Succinate                             |                              | Malate / fumarate                                | Acetoacetate / leucine                                |
| Fumarate                              |                              | Lactate / pyruvate                               | $\beta$ -hydroxybutyrate / leucine                    |
| Malate                                |                              | Citrate / malate                                 | Isovalerate / $\beta$ -hydroxybutyrate                |
| Hippurate                             |                              | Acetoacetate / $\beta$ -hydroxybutyrate          | $\beta$ -hydroxybutyrate / Branched-chain amino acids |
| Glyoxylate                            |                              | 2-Hydroxyglutarate / $\alpha$ -ketoglutarate     | Acetoacetate / brached-chain amino acids              |
| Hydroxymethylbutyrate                 |                              | $\alpha$ -ketoglutarate / glutamate              | Isovalerate / 3-hydroxykynurenine                     |
| Acetoacetate                          |                              | Glyoxylate / isocitrate                          | 2-Hydroxyglutarate / isocitrate                       |
| Lipids                                |                              |                                                  |                                                       |
| Diacylglycerol 16:1                   | Lysophosphatidylcholine 18:0 | Ceramide d18:1 C22:0 / ceramide d18:1 C18:0      |                                                       |

|                                 |                                                                   |                                                              |                                                                                                |
|---------------------------------|-------------------------------------------------------------------|--------------------------------------------------------------|------------------------------------------------------------------------------------------------|
| Diacylglycerol 16:0             | Ceramide d18:1 C14:0                                              | Ceramide d18:1 C24:0 / ceramide d18:1 C16:0                  |                                                                                                |
| Diacylglycerol 16:0 18:2        | Ceramide d18:1 C16:0                                              | Monoacylglycerol 16:0 / diacylglycerol 16:0                  |                                                                                                |
| Diacylglycerol 18:1 16:0        | Ceramide d18:1 C18:0                                              | Monoacylglycerol 20:4 / diacylglycerol 20:4                  |                                                                                                |
| Diacylglycerol 16:0 18:0        | Ceramide d18:1 C20:0                                              | Monoacylglycerol 18:1 / diacylglycerol 18:1                  |                                                                                                |
| Diacylglycerol 18:2             | Ceramide d18:1 C22:0                                              | Monoacylglycerol 18:2 / diacylglycerol 18:2                  |                                                                                                |
| Diacylglycerol 18:0 18:2        | Ceramide d18:1 C24:0                                              | Hexosylceramide C16:0 / ceramide C16:0                       |                                                                                                |
| Diacylglycerol 18:1             | Ceramide d18:1 C24:1                                              | Hexosylceramide C18:0 / ceramide C18:0                       |                                                                                                |
| Diacylglycerol 18:0 18:1        | Hexosylceramide C16:0                                             | Hexosylceramide C20:0 / ceramide C20:0                       |                                                                                                |
| Diacylglycerol 18:0             | Hexosylceramide C18:0                                             | Hexosylceramide C22:0 ceramide C22:0                         |                                                                                                |
| Diacylglycerol 18:0 20:4        | Hexosylceramide C20:0                                             | Hexosylceramide C24:0 / ceramide C24:0                       |                                                                                                |
| Monoacylglycerol 16:0           | Hexosylceramide C22:0                                             | Hexosylceramide C24:1 / ceramide C24:1                       |                                                                                                |
| Monoacylglycerol 18:2           | Hexosylceramide C24:0                                             | Hexosylceramide C22:0 / hexosylceramide C18:0                |                                                                                                |
| Monoacylglycerol 18:1           | Hexosylceramide C24:1                                             | Hexosylceramide C22:0 / ceramide C18:0                       |                                                                                                |
| Monoacylglycerol 20:4           | Sphingosine                                                       |                                                              |                                                                                                |
| Lysophosphatidylcholine 16:0    |                                                                   |                                                              |                                                                                                |
| <b>Steroids</b>                 |                                                                   |                                                              |                                                                                                |
| Cortisol                        | Androstandiol-glucuronide                                         | 20 $\alpha$ -dihydrocortisol / cortisol                      | Deoxycorticosterone / corticosterone                                                           |
| 20 $\alpha$ -dihydrocortisol    | 5 $\beta$ -Androstan-3 $\alpha$ ,17 $\alpha$ -diol-17-glucuronide | 20 $\beta$ -dihydrocortisol / cortisol                       | Cortisol / 11-deoxycortisol                                                                    |
| 20 $\beta$ -dihydrocortisol     | Pregnandiol-glucuronide                                           | 20 $\alpha$ -dihydrocortisol / 20 $\beta$ -dihydrocortisol   | 11-deoxycortisol / 11-hydroxyprogesterone                                                      |
| 5 $\alpha$ -tetrahydrocortisol  | 5-Androsten-3 $\beta$ ,17 $\beta$ -diol-disulfate                 | 5 $\alpha$ -tetrahydrocortisol / cortisol                    | Testosterone / androstenedione                                                                 |
| 5 $\beta$ -tetrahydrocortisol   | 5-Androsten-3 $\beta$ ,17 $\alpha$ -diol-disulfate                | 5 $\beta$ -tetrahydrocortisol / cortisol                     | Etiocholanolone / testosterone                                                                 |
| 6 $\beta$ -hydroxycortisol      | Androstenedione-3 $\beta$ ,17 $\beta$ -disulfate                  | 6 $\beta$ -hydroxycortisol / cortisol                        | Etiocholanolone glucuronide / androsterone glucuronide                                         |
| Cortisone                       | 5 $\alpha$ ,3 $\alpha$ ,17 $\beta$ -Adiol-3,17 bis(sulfate)       | Cortisol / cortisone                                         | Etiocholanolone sulfate / androsterone sulfate                                                 |
| 20 $\alpha$ -dihydrocortisone   | 5-Pregnen-3 $\beta$ ,20 $\alpha$ -diol bis(sulfate)               | Cortisol metabolites / cortisone metabolites                 | Testosterone sulfate / testosterone                                                            |
| 20 $\beta$ -dihydrocortisone    | 5 $\alpha$ -Pregnan-3 $\beta$ ,20 $\alpha$ -diol bis(sulfate)     | 20 $\alpha$ -dihydrocortisone / cortisone                    | Dehydroepiandrosterone sulfate / androstenedione                                               |
| 5 $\alpha$ -tetrahydrocortisone | 21-hydroxypregnenolone bis(sulfate)                               | 20 $\beta$ -dihydrocortisone cortisone                       | 5 $\beta$ -Androstan-3 $\alpha$ ,17 $\beta$ -diol-17-sulfate / dehydroepiandrosterone sulfate  |
| 5 $\beta$ -tetrahydrocortisone  | 5 $\beta$ -Pregnandiol-3-sulfate-20 $\alpha$ -glucuronide         | 20 $\alpha$ -dihydrocortisone / 20 $\beta$ -dihydrocortisone | 5 $\alpha$ -androstan-3 $\alpha$ ,17 $\beta$ -diol-17-sulfate / dehydroepiandrosterone sulfate |
| Corticosterone                  | Dehydroepiandrosterone-sulfate                                    | 5 $\alpha$ -tetrahydrocortisone cortisone                    | 5 $\alpha$ -androstan-3 $\beta$ ,17 $\beta$ -diol-17-sulfate / Dehydroepiandrosterone sulfate  |
| 11-dehydrocorticosterone        | Epiandrosterone-sulfate                                           | 5 $\beta$ -tetrahydrocortisone cortisone                     | Estradiol sulfate / estrone sulfate                                                            |
| Deoxycorticosterone             | Etiocholanolone-sulfate                                           | 11-dehydrocorticosterone / corticosterone                    | estradiol sulfate / testosterone                                                               |
| 11-deoxycortisol                | 5 $\beta$ -Androstan-3 $\beta$ ,17 $\beta$ -diol-3-sulfate        | 11-dehydrocorticosterone / cortisone                         | estradiol sulfate / testosterone sulfate                                                       |
| 17-hydroxyprogesterone          | 5 $\alpha$ -Androstan-3 $\alpha$ ,17 $\beta$ -diol-3-sulfate      |                                                              |                                                                                                |
| Etiocholanolone                 | 5 $\alpha$ -Androstan-3 $\beta$ ,17 $\beta$ -diol-3-sulfate       |                                                              |                                                                                                |
| Androstenedione                 | 16 $\alpha$ -hydroxy-dehydroepiandrosterone-3-sulfate             |                                                              |                                                                                                |

|                                                               |                                                            |  |
|---------------------------------------------------------------|------------------------------------------------------------|--|
| Testosterone                                                  | Pregnenolone-sulfate                                       |  |
| Testosterone sulfate                                          | Pregnanolone-sulfate                                       |  |
| Epiandrosterone-sulfate                                       | 5 $\alpha$ -Pregan-3 $\beta$ ,20 $\alpha$ -diol-3-sulfate  |  |
| Androsterone-sulfate                                          | 5 $\beta$ -Pregan-3 $\beta$ ,20 $\alpha$ -diol-3-sulfate   |  |
| 5 $\beta$ -Androstan-3 $\alpha$ ,17 $\beta$ -diol-17-sulfate  | 5 $\alpha$ -Pregan-3 $\beta$ ,20 $\alpha$ -diol-20-sulfate |  |
| 5 $\alpha$ -Androstan-3 $\alpha$ ,17 $\beta$ -diol-17-sulfate | 5-Pregnenolone-3-sulfate                                   |  |
| 5 $\alpha$ -Androstan-3 $\beta$ ,17 $\beta$ -diol-17-sulfate  | Tetrahydrocortisone glucuronide                            |  |
| Androsterone-glucuronide                                      | Estrone sulfate                                            |  |
| Etiocholanolone-glucuronide                                   | Estradiol sulfate                                          |  |
| Tetrahydrocortisol glucuronide                                |                                                            |  |

**3.4. Table S4.** Standards and reagents, and their corresponding suppliers

| Pathway               | Standards and reagents                                       | Supplier |
|-----------------------|--------------------------------------------------------------|----------|
| Tryptophan metabolism | Tryptophan (Trp)                                             | SA       |
|                       | Serotonin (5HT)                                              | SA       |
|                       | 5-Hydroxyindoleacetic acid (5HIAA)                           | SA       |
|                       | Kynurenine (Kyn)                                             | SA       |
|                       | Kynurenic acid (KA)                                          | SA       |
|                       | 3-Hydroxy kynurenine (3OHKyn)                                | SA       |
|                       | Phenylalanine                                                | SA       |
|                       | Tyrosine                                                     | SA       |
|                       | Tyrosine                                                     | SA       |
|                       | Valine                                                       | SA       |
|                       | Leucine                                                      | SA       |
|                       | Isoleucine                                                   | SA       |
|                       | Methionine                                                   | SA       |
|                       | Tryptophan-d <sub>5</sub>                                    | Alsachim |
|                       | Kynurenine- <sup>13</sup> C <sub>6</sub>                     | Alsachim |
|                       | 3-Hydroxy kynurenine- <sup>13</sup> C <sub>6</sub>           | Alsachim |
|                       | 5-Hydroxyindoleacetic acid-d <sub>4</sub>                    | Alsachim |
|                       | Kynurenine acid-d <sub>5</sub>                               | TRC      |
|                       | Serotonin-d <sub>5</sub>                                     | TRC      |
| Carboxylic acids      | Lactic acid (LA)                                             | SA       |
|                       | Pyruvic acid (PyA)                                           | SA       |
|                       | Citric acid (CA)                                             | SA       |
|                       | Isocitric acid (IA)                                          | SA       |
|                       | Succinic acid (SA)                                           | SA       |
|                       | Fumaric acid (FA)                                            | SA       |
|                       | Malic acid (MA)                                              | SA       |
|                       | Hippuric acid                                                | SA       |
|                       | Tryptophan                                                   | SA       |
|                       | Lactic acid- <sup>13</sup> C <sub>3</sub>                    | SA       |
|                       | Pyruvic acid- <sup>13</sup> C <sub>3</sub>                   | TRC      |
|                       | Citric acid-d <sub>4</sub>                                   | SA       |
|                       | Succinic acid-d <sub>4</sub>                                 | SA       |
|                       | Fumaric acid- <sup>13</sup> C <sub>4</sub>                   | SA       |
|                       | Malic acid-d <sub>3</sub>                                    | CIL      |
|                       | Tryptophan-d <sub>5</sub>                                    | TRC      |
|                       | N-(3-Dimethylaminopropyl)-N'-ethylcarbodiimide hydrochloride | SA       |
|                       | o-benzyl hydroxylamine                                       | SA       |
|                       | Hydrochloric acid                                            | Merck    |
|                       | Pyridine                                                     | Merck    |
| Lipids                | Diacylglycerol 16:0-d <sub>5</sub>                           | APL      |
|                       | Diacylglycerol 16:1-d <sub>5</sub>                           | APL      |
|                       | Diacylglycerol 18:0-d <sub>5</sub>                           | APL      |
|                       | Diacylglycerol 18:1-d <sub>5</sub>                           | APL      |
|                       | Diacylglycerol 18:2-d <sub>5</sub>                           | APL      |



|                   |                                                             |               |
|-------------------|-------------------------------------------------------------|---------------|
|                   | Diacylglycerol 20:4-d <sub>5</sub>                          | APL           |
|                   | Ceramide 18:1 C16:0-d <sub>7</sub>                          | APL           |
|                   | Ceramide 18:1 C18:0-d <sub>7</sub>                          | APL           |
|                   | Ceramide 18:1 C24:0-d <sub>7</sub>                          | APL           |
|                   | Ceramide 18:1 C24:1-d <sub>7</sub>                          | APL           |
| Neurotransmitters | Creatinine                                                  | SA            |
|                   | Creatine                                                    | SA            |
|                   | Valine                                                      | SA            |
|                   | Leucine                                                     | SA            |
|                   | Isoleucine                                                  | SA            |
|                   | Choline                                                     | SA            |
|                   | Glutamine                                                   | SA            |
|                   | Glutamic acid                                               | SA            |
|                   | Acetyl carnitine                                            | SA            |
|                   | Carnitine                                                   | SA            |
|                   | Phenylalanine                                               | SA            |
|                   | Tryptophan                                                  | SA            |
|                   | Tyrosine                                                    | SA            |
|                   | Trimethylamine N-oxide                                      | SA            |
|                   | Creatinine-d <sub>3</sub>                                   | TRC           |
|                   | Glutamine-d <sub>5</sub>                                    | TRC           |
|                   | Glutamic acid- <sup>13</sup> C- <sup>15</sup> N             | TRC           |
|                   | Phenylalanine-d <sub>5</sub>                                | TRC           |
|                   | Tryptophan-d <sub>5</sub>                                   | TRC           |
|                   | Tyrosine-d <sub>4</sub>                                     | TRC           |
|                   | Trimethylamine N-oxide-d <sub>9</sub>                       | SA            |
| Steroids          | Cortisol (F)                                                | Steraloids    |
|                   | 20 $\alpha$ -dihydrocortisol (20aDHF)                       | Steraloids    |
|                   | 20 $\beta$ -dihydrocortisol (20bDHF)                        | Steraloids    |
|                   | 6 $\beta$ -hydroxycortisol (6OHF)                           | Steraloids    |
|                   | Cortisone (E)                                               | Merck         |
|                   | 20 $\alpha$ -dihydrocortisone (20aDHE)                      | Steraloids    |
|                   | 20 $\beta$ -dihydrocortisone (20bDHE)                       | Steraloids    |
|                   | 6 $\beta$ -hydroxycortisone (6OHE)                          | Steraloids    |
|                   | Corticosterone (B)                                          | Steraloids    |
|                   | 11-dehydrocorticosterone (A)                                | Steraloids    |
|                   | Testosterone (T)                                            | Steraloids    |
|                   | Epitestosterone (epiT)                                      | Steraloids    |
|                   | Androstenedione (AED)                                       | Steraloids    |
|                   | Progesterone (Prog)                                         | Steraloids    |
|                   | Epiandrosterone-sulfate (epiANS)                            | Steraloids    |
|                   | Androsterone-sulfate (ANS)                                  | Steraloids    |
|                   | Androsterone-glucuronide                                    | LGC           |
|                   | Etiocholanolone-glucuronide                                 | LGC           |
|                   | 5 $\beta$ ,3 $\alpha$ ,17 $\alpha$ -Adiol-17-glucuronide    | LGC           |
|                   | Pregnandiol-glucuronide                                     | Steraloids    |
|                   | Androstenedione-3 $\beta$ ,17 $\beta$ -disulfate            | Lab synthesis |
|                   | 5 $\alpha$ ,3 $\alpha$ ,17 $\beta$ -Adiol-3,17 bis(sulfate) | Lab synthesis |

|                 |                                                                                                  |               |
|-----------------|--------------------------------------------------------------------------------------------------|---------------|
|                 | 5 $\alpha$ ,3 $\beta$ ,17 $\beta$ -Adiol-3,17 bis(sulfate)                                       | Lab synthesis |
|                 | 5 $\beta$ ,3 $\beta$ ,20 $\alpha$ -Pregnandiol bis(sulfate)                                      | Lab synthesis |
|                 | 5 $\alpha$ ,3 $\beta$ ,20 $\alpha$ -Pregnandiol bis(sulfate)                                     | Steraloids    |
|                 | 3 $\beta$ ,21-Dihydroxypregn-5-en-20-one bis(sulfate)                                            | Lab synthesis |
|                 | 5 $\beta$ -Pregnandiol-3-sulfate-20 $\alpha$ -glucuronide                                        | Lab synthesis |
|                 | Dehydroepiandrosterone-sulfate (DHEAS)                                                           | Steraloids    |
|                 | Epiandrosterone-sulfate (epiANS)                                                                 | Steraloids    |
|                 | Etiocholanolone-sulfate (EtioS)                                                                  | Steraloids    |
|                 | 5 $\beta$ ,3 $\alpha$ ,17 $\beta$ -Adiol-3-sulfate                                               | Lab synthesis |
|                 | 5 $\alpha$ ,3 $\alpha$ ,17 $\beta$ -Adiol-3-sulfate                                              | Lab synthesis |
|                 | 5 $\alpha$ ,3 $\beta$ ,17 $\beta$ -Adiol-3-sulfate                                               | Lab synthesis |
|                 | 16 $\alpha$ -hydroxy-dehydroepiandrosterone-3-sulfate                                            | Steraloids    |
|                 | Pregnanolone-sulfate                                                                             | Steraloids    |
|                 | Pregnanolone-sulfate                                                                             | Steraloids    |
|                 | 5 $\alpha$ ,3 $\beta$ ,20 $\beta$ -Pregnandiol-3-sulfate                                         | Steraloids    |
|                 | 5 $\beta$ -Pregnandiol-20-one-3-sulfate                                                          | Steraloids    |
|                 | Estradiol-sulfate (E2S)                                                                          | Steraloids    |
|                 | 6 $\beta$ -hydroxycortisol-d <sub>4</sub>                                                        | TRC           |
|                 | Cortisol-d <sub>4</sub>                                                                          | SA            |
|                 | Testosterone-d <sub>3</sub>                                                                      | NMI           |
|                 | Epitestosterone-d <sub>3</sub>                                                                   | LGC           |
|                 | Epitestosterone-d <sub>3</sub> -sulfate                                                          | LGC           |
|                 | Epitestosterone-d <sub>4</sub> -glucuronide                                                      | LGC           |
|                 | Epiandrosterone- <sup>18</sup> O <sub>3</sub> -sulfate                                           | Lab synthesis |
|                 | Androsterone-d <sub>4</sub> -glucuronide                                                         | NMI           |
|                 | Estradiol-d <sub>3</sub> -sulfate                                                                | LGC           |
|                 | 5 $\alpha$ ,3 $\alpha$ ,17 $\beta$ -Adiol-3,17-disulfate- <sup>18</sup> O <sub>3</sub>           | Lab synthesis |
|                 | 5 $\alpha$ ,3 $\beta$ ,17 $\beta$ -Adiol-3,17-disulfate- <sup>18</sup> O <sub>3</sub>            | Lab synthesis |
|                 | 5 $\alpha$ ,3 $\beta$ ,17 $\beta$ -Adiol-3-sulfate- <sup>18</sup> O <sub>3</sub> -17-glucuronide | Lab synthesis |
| Common material | Water milliQ                                                                                     | MI            |
|                 | Ammonium formate                                                                                 | SA            |
|                 | Methanol                                                                                         | Merck         |
|                 | Formic acid                                                                                      | Merck         |
|                 | Acetonitrile                                                                                     | Merck         |
|                 | Ethyl Acetate                                                                                    | Merck         |

#### 4. References

1. Gomez-Gomez A, Soldevila A, Pizarro N, Andreu-Fernandez V, Pozo OJ. Improving liquid chromatography-tandem mass spectrometry determination of polycarboxylic acids in human urine by chemical derivatization. Comparison of o-benzyl hydroxylamine and 2-picoyl amine. *Journal of pharmaceutical and biomedical analysis* 2019; **164**: 382-94.
2. Olesti E, Rodríguez-Morató J, Gomez-Gomez A, Ramaekers JG, de la Torre R, Pozo OJ. Quantification of endogenous neurotransmitters and related compounds by liquid chromatography coupled to tandem mass spectrometry. *Talanta* 2019; **192**: 93-102.
3. Velázquez AM, Roglans N, Bentanachs R, et al. Effects of a Low Dose of Caffeine Alone or as Part of a Green Coffee Extract, in a Rat Dietary Model of Lean Non-Alcoholic Fatty Liver Disease without Inflammation. *Nutrients* 2020; 12(11).
4. Marcos J, Renau N, Valverde O, et al. Targeting tryptophan and tyrosine metabolism by liquid chromatography tandem mass spectrometry. *Journal of chromatography A* 2016; **1434**: 91-101.
5. Gomez-Gomez A, Miranda J, Feixas G, et al. Determination of the steroid profile in alternative matrices by liquid chromatography tandem mass spectrometry. *The Journal of steroid biochemistry and molecular biology* 2020; **197**: 105520.
6. Pozo OJ, Marcos J, Khymenets O, et al. SULFATION PATHWAYS: Alternate steroid sulfation pathways targeted by LC-MS/MS analysis of disulfates: application to prenatal diagnosis of steroid synthesis disorders. *Journal of Molecular Endocrinology* 2018; **61**(2): M1-m12.
